1 **Multiplex PCR Assays for Identifying All Major SARS-CoV-2 Variants**

2 **Short title: SARS-CoV-2 Variant Multiplex PCR Assays**

3 **Ryan J. Dikdan<sup>1</sup> BS, Salvatore AE Marras<sup>1,2</sup> PhD, Amanda P. Field<sup>3</sup> MPH, Alicia Brownlee<sup>3</sup> BS, Alexander**  
4 **Cironi<sup>3</sup> BS, D. Ashley Hill<sup>3</sup> MD, and Sanjay Tyagi<sup>1,4</sup> PhD**

5 <sup>1</sup>Public Health Research Institute, New Jersey Medical School, Rutgers University, Newark, New Jersey

6 <sup>2</sup>Department of Microbiology, Biochemistry and Molecular Genetics, New Jersey Medical School, Rutgers  
7 University, Newark, New Jersey

8 <sup>3</sup>ResourcePath LLC, Sterling, VA

9 <sup>4</sup>Department of Medicine, New Jersey Medical School, Rutgers University, Newark, New Jersey

L0 **Text Pages (not including title page, tables, or figure legends): 18      Tables: 3      Figures: 5**

L1 **Conflicts of Interest:**

L2 D. Ashley Hill is the Medical Director of ResourcePath and Amanda P. Field, Alicia Brownlee, and Alex Cironi  
L3 are employed by ResourcePath. ResourcePath partly funded this work through a grant to Rutgers. Ryan J.  
L4 Dikdan, Salvatore A.E. Marras, and Sanjay Tyagi declare no conflicts of interests.

L5 **Support:**

L6 This research was supported through a grant from NIH R01 CA227291 awarded to ST and a grant from  
L7 ResourcePath, LLC.

L8 **Correspondence and address:**

L9 [rijd254@njms.rutgers.edu](mailto:rijd254@njms.rutgers.edu) , [sanjay.tyagi@rutgers.edu](mailto:sanjay.tyagi@rutgers.edu) - Public Health Research Institute, Rutgers  
20 University, ICPH Building Rm W310E, 225 Warren Street, Newark NJ 07103

21 [hill@resourcepath.net](mailto:hill@resourcepath.net) - ResourcePath LLC, 45945 Trefoil Lane, Suite 175 Sterling, VA 20166

## Abstract

Variants of Concern (VOC) of SARS-CoV-2, including Alpha, Beta, Gamma, Delta, and Omicron threaten to prolong the pandemic leading to more global morbidity and mortality. Genome sequencing is the mainstay of tracking the development and evolution of the virus, but is costly, slow, and not easily accessible. A multiplex qRT-PCR assay for SARS-CoV-2 was developed, which identifies all VOC as well as other mutations of interest in the viral genome, eight mutations total, using single nucleotide discriminating molecular beacons in a two-tube assay. The presented variant molecular beacon assay showed a limit of detection of five copies of the viral RNA, with 100% specificity. Twenty-six SARS-CoV-2 positive patient samples were blinded and tested using this assay. When testing patient samples, the assay was in full agreement with results from deep sequencing with a sensitivity and specificity of 100% (26/26). We have used our design methodology to rapidly design an assay which detects the new Omicron variant. This Omicron assay was used to accurately identify this variant in 17 of 33 additional patient samples. These qRT-PCR assays identify all currently circulating VOC of SARS-CoV-2 as well as other important mutations in its Spike protein coding sequence. These assays can be easily implemented on broadly available five-color thermal cyclers and will help track the spread of these variants.

## 38 Introduction

39 The COVID-19 pandemic has changed the world, leading to at least 5.3 million deaths and many permanent  
40 injuries, with over 271 million cases worldwide as of 20 December 2021

41 (<https://www.who.int/emergencies/diseases/novel-coronavirus-2019>, date of last access: 12/20/2021).

42 Despite advances in diagnosis and vaccination, the emergence of SARS-CoV-2 variants threatens to keep the  
43 pandemic going<sup>1</sup>. The World Health Organization and the US Centers for Disease Control (CDC)

44 (<https://www.cdc.gov/coronavirus/2019-ncov/variants/variant-info.html>), date of last access: 12/20/2021)

45 have identified SARS-CoV-2 Variants of Concern (VOCs), which lead to increased disease severity

46 (<https://www.gov.uk/government/publications/nervtag-paper-on-covid-19-variant-of-concern-b117>, date of  
47 last access: 12/20/2021), increased transmission<sup>2</sup>, and immune/vaccine evasion<sup>3-5</sup>. Variants of Interest (VOIs)

48 have also been identified that present theoretical risks because they possess mutations similar to the

49 mutations in the VOC. Specific frequently occurring mutations have also been identified which can affect

50 therapeutic antibody treatments for patients infected with such variants<sup>6</sup>. These new variants and

51 substitutions necessitate new tools for their detection and tracking<sup>7</sup>.

52 Currently, the most common technique to identify, classify, and track variants of SARS-CoV-2 is deep

53 sequencing<sup>8,9</sup>. While sequencing is accurate and can identify each mutation present in a sample, it is costly,

54 slow, and requires specialized instruments and interpretation when compared to other genotyping

55 techniques, such as Polymerase Chain Reaction (PCR)<sup>1</sup>. Although, PCR assays target preselected mutations,

56 they are cheaper and more accessible than sequencing for the genotyping of SARS-CoV-2, and they yield faster

57 results. These methods may permit better tracking of variants as they spread throughout populations over

58 time, especially in resource limited settings<sup>1</sup>.

59 Several SARS-CoV-2 variant genotyping PCR assays have been developed. They utilize TaqMan probes as those

50 from Thermo Fisher Scientific (Waltham, MA), sloppy molecular beacon probes followed by melting temperature

It is made available under a [CC-BY-NC 4.0 International license](https://creativecommons.org/licenses/by-nc/4.0/) .

51 analysis<sup>9</sup>, and several other strategies such as PerkinElmer's PKamp (Waltham, MA), and Aldatu Biosciences  
52 (Watertown, MA). However, most of these assays either target single mutations per reaction or lack the  
53 appropriate number of targets to thoroughly characterize SARS-CoV-2. Simple assays that detect multiple  
54 mutations at the same time are needed for identification of circulating VOCs, VOIs, and for the identification  
55 of specific mutations.

56 Our approach is to create a multiplex assay for SARS-CoV-2 variants by exploiting the superior selectivity and  
57 self-quenching characteristics of molecular beacons. Molecular beacons can be designed to selectively bind to  
58 a mutant target sequence, while avoiding the wild-type sequence, which differs from the mutant by a single  
59 nucleotide substitution. The interaction of a molecular beacon with its target is inherently more specific than  
60 linear oligonucleotides that do not have a stem and loop structure, because target binding requires the  
61 dissociation of the stem, which is thermodynamically costly<sup>10</sup>. The utility of this discriminatory power has been  
62 previously demonstrated in real-time PCR for a number of applications<sup>11,12</sup>.

63 Here we present a two-tube multiplex qRT-PCR assay that identifies current VOCs by detecting eight different  
64 mutations in the SARS-CoV-2 spike protein. We selected mutations that have been shown to increase immune  
65 escape, avoid neutralization, and increase transmissibility. Targeting these causative mutations is fruitful,  
66 because these strains may mutate and lose certain coincidental mutations, but mutations that increase  
67 transmission and immune evasion are likely to be maintained. Also, by targeting these types of mutations, it is  
68 possible to detect new variants that arise from combinations of previously confirmed mutations, as is the case  
69 of VOC Omicron. We also describe a molecular beacon design process that can be used to rapidly produce  
70 allele discriminating assays for new variants as they arise. As a proof of this design process, we created a new  
71 assay within two weeks for accurately identifying the Omicron variant.

## 32 **Materials and Methods**

### 33 **Synthetic RNA targets**



It is made available under a [CC-BY-NC 4.0 International license](https://creativecommons.org/licenses/by-nc/4.0/) .

34 RNA standards of the SARS-CoV-2 whole genome and variant spike proteins were provided by Exact  
35 Diagnostics through Bio-Rad Laboratories, Hercules, CA (catalog numbers COV019, COV019CE, COVA, COVB,  
36 COVE, COVG). Additional spike protein RNA sequences, such as those containing the E484Q and T478K  
37 mutations and the omicron spike RNA, were generated from a double-stranded synthetic DNA (gBlock) from  
38 Integrated DNA Technologies (Coralville, IA). A 5'-T7 promoter was appended to it, which enabled  
39 transcription by T7 RNA polymerase, which was performed using the HiScribe™ T7 High Yield RNA Synthesis Kit  
40 (New England Biolabs, Ipswich, MA). The RNA produced was purified with a Monarch RNA Cleanup Kit, 50 µg,  
41 (New England Biolabs) and by denaturing polyacrylamide gel electrophoresis, eluting the band of correct size  
42 in gel elution buffer (400 mM NaCl, 20 mM Tris-HCl (pH 8.0), and 1 mM EDTA). The concentration of the eluted  
43 RNAs was determined by a NanoDrop spectrophotometer (Thermo Fisher Scientific).

#### 44 **Primer Design**

45 Primers were designed by using the primer3 server<sup>13</sup>. 200 nucleotides surrounding the mutation of interest on  
46 either side of the SARS-CoV-2 genome was used as input, the target-binding region of the molecular beacon  
47 was used as the hybridization probe, and the amplicon size was set between 50 to 300 nucleotides. The  
48 sequences of all the primers that were used in the assay are shown in Table 1.

#### 49 **Design and characterization of single nucleotide discriminating molecular beacons**

50 A key consideration in the design of single-nucleotide discriminating molecular beacons is that the melting  
51 temperature ( $T_m$ ) of the probe-target hybrid with the perfect target (in the present case, the mutant  
52 sequence) is minimally above, only 3 to 7 °C, the annealing temperature of the PCR (which is the temperature  
53 at which fluorescence will be monitored). This makes it so that the mismatched hybrid (in the present case,  
54 the wild-type sequence) will not appreciably bind to the molecular beacon at the fluorescence monitoring  
55 temperature. Furthermore, the melting temperature of the stem of the molecular beacon should be above the  
56 detection temperature.

It is made available under a [CC-BY-NC 4.0 International license](https://creativecommons.org/licenses/by-nc/4.0/) .

07 We designed our primers so that they will function at the PCR annealing temperature of 58 °C. We selected a  
08 region of sequence around the site of each mutation such that the  $T_m$  of the perfect probe-target hybrid was  
09 above the annealing temperature, but that the mismatched single-nucleotide polymorphism had a  $T_m$  lower  
10 than the annealing temperature. These  $T_m$ 's were predicted by using the DINAMelt<sup>14</sup> two-state melting  
11 hybridization server with the following parameters: 0.25  $\mu$ M oligonucleotide concentration,  $[Na^+]$  = 60 mM,  
12  $[Mg^{2+}]$  = 3 mM, for DNA at 58 °C.

13 After deciding upon the target binding region, a hairpin stem was created by appending 5 or 6 nucleotides on  
14 either side (with 4 to 5 G:C pairs) such that they are complementary to each other, but not complementary to  
15 the target. In addition, we ensured that the 5' nucleotide is not a guanosine, because that could lead to  
16 fluorescence quenching due to the 5' position of the fluorophore. These sequences were then ordered from  
17 either LGC Biosearch Technologies (Petaluma, CA) or from Eurofins (Luxembourg City, Luxembourg). They  
18 were purified by HPLC through a PRP-3 Reversed Phase HPLC Column (Hamilton Company, Reno, NV) in a  
19 Beckman System Gold HPLC System (Fullerton, CA). The desired fractions were then ethanol precipitated and  
20 resuspended in water, and their concentration was determined by NanoDrop spectrophotometer. The  
21 sequences of all molecular beacons that were used in the assay are shown in Table 1.

22 To determine if the designed sequences could sufficiently discriminate the alleles at the annealing  
23 temperature of the PCR assay, we measured the fluorescence of the molecular beacons in the presence of  
24 either a mutant target, a wild-type target or, no target, under the buffer conditions that are expected to be  
25 present during PCR. Each 25  $\mu$ L thermal denaturation reaction contained 20 mM Tris-HCl (pH 8.4), 50 mM KCl,  
26 1.5 mM  $MgCl_2$ , 1  $\mu$ M oligonucleotide target, and 0.4  $\mu$ M molecular beacon. The fluorescence intensity of each  
27 reaction was measured at every degree in the appropriate fluorescence channel as the temperature was  
28 lowered from 95 °C to 30 °C (decreasing 1 °C/10 seconds) in a Bio-Rad CFX96 Touch Real-Time PCR Detection  
29 System.

It is made available under a [CC-BY-NC 4.0 International license](https://creativecommons.org/licenses/by-nc/4.0/) .

30 Melt curve signals were normalized, for each molecular beacon. The difference between a normalization point  
31 and the other melt curve fluorescent signals was subtracted from the raw fluorescent intensity values and  
32 then all values in that channel were divided by the maximum intensity for that molecular beacon, to derive  
33 relative fluorescence units, which range between 0 and 1. These data are shown in Figure S1.

#### 34 **Optimizing the concentrations of the qRT-PCR multiplex primers and molecular beacons**

35 qRT-PCR was performed with TaqMan Fast Virus 1-Step Master Mix (No ROX) to optimize conditions, and  
36 TaqPath™ 1-Step Multiplex Master Mix (No ROX) (both from Applied Biosystems, Waltham, MA) for final  
37 experiments and patient samples.

38 Asymmetric PCR was performed for each amplicon, where the primer generating the strand complementary to  
39 the molecular beacon (labeled reverse) was in 5-fold excess over the other primer (labeled forward). All  
40 molecular beacons were designed in the same forward strand direction. G:T mismatches can be discriminated  
41 from each other by switching the strand being interrogated to the complementary strand<sup>15</sup>. The molecular  
42 beacon and primer concentrations were adjusted by trial and error, for sufficient amplification and signal. The  
43 final working concentrations of each of the components for each tube are listed in Table 1 along with their  
44 sequences.

45 Each reaction had a final volume of 20  $\mu$ L comprised of TaqPath or TaqMan Master 1-Step Mix (No ROX),  
46 water, and primers and probes as previously described. 15  $\mu$ L of this complete master mix was pipetted into  
47 each PCR tube, and then 5  $\mu$ L of sample was added and mixed, before running on the thermal cycler.

#### 48 **Assay sensitivity and specificity**

49 The sensitivity of the assay was determined by preparing dilution series of *in vitro* transcribed targets, which  
50 were diluted 10-fold from 1,000 copies/ $\mu$ L to 0.1 copies/ $\mu$ L. 5  $\mu$ L of each of these dilutions were combined  
51 with 15  $\mu$ L of completed master mix per reaction. The tubes were sealed, briefly shaken, spun down at 800 g

It is made available under a [CC-BY-NC 4.0 International license](https://creativecommons.org/licenses/by-nc/4.0/) .

52 for 1 min. and then run on a Bio-Rad CFX96 Touch Real-Time PCR Detection System with the TaqPath or  
53 TaqMan Fast specified thermal cycler conditions, and with an annealing temperature of 58 °C. Specificity of  
54 the assay was determined by comparing the known sequences of the *in vitro* transcribed targets with the  
55 signals in these dilution series. For patient samples, sensitivity and specificity were determined by comparing  
56 this assay's results to sequencing results, which are the gold standard.

### 57 **Collection of patient samples and sequencing**

58 Patient mid-nasal swabs were collected for clinical testing in 1 ml of DNA/RNA Shield Reagent (Zymo, Irvine,  
59 CA). 400 µL aliquots were used for RNA extraction using the Kingfisher Flex magnetic bead extraction system  
60 (Thermo Fisher Scientific) and the Zymo Quick RNA/DNA Magbead kit (Zymo) per manufacturer's instructions.  
61 qRT-PCR screening was performed using 2 µL of purified RNA, TaqPath 1-step Multiplex Master Mix (No ROX)  
62 and an in-house validated multiplex screening assay. This screening assay, outlined in Figure S2, detects  
63 conserved sequences in the *N* and *RdRp* genes of SARS-CoV-2, along with human *ACTB* (*β-actin*) mRNA, with  
64 high sensitivity. The primers and molecular beacons targeting regions in the *RdRp*, *N*, and human *ACTB* genes  
65 were modified and adapted from previously validated assays<sup>16</sup> ([https://www.cdc.gov/coronavirus/2019-  
66 ncov/lab/rt-pcr-panel-primer-probes.html](https://www.cdc.gov/coronavirus/2019-ncov/lab/rt-pcr-panel-primer-probes.html)), date of last access: 12/7/2021), and are listed in Table 2. Samples  
67 were run on a Quantstudio 7 (Thermo Fisher Scientific). Amplicon sequencing was performed using the Ion  
68 AmpliSeq SARS-CoV-2 Insight Research Panel (Ion Torrent, Guilford, CT). Each library contained six samples,  
69 one positive control sample and one no template control. Barcoded libraries were prepared using the  
70 Ampliseq Kit for Chef DL8 and Ion 530 Kit-Chef (Ion Torrent). Sixteen libraries were combined to run on a  
71 single Ion 530 chip. Templates were prepared using the Ion 530 Chef Reagents template kit. Sequencing was  
72 performed on the Ion S5XL instrument with Ion S5 Sequencing Solutions and Reagents (Ion Torrent). Sequence  
73 data was analyzed for on-target and mean depth of coverage using the SARS\_COV\_2\_Coverage Analysis plug-  
74 in v1.3.0.2 (Ion Torrent). FASTA files were created using the IRMA report plug-in v1.3.0.2 (Ion Torrent).

It is made available under a [CC-BY-NC 4.0 International license](https://creativecommons.org/licenses/by-nc/4.0/) .

75 Sequence data and corresponding metadata were uploaded to GISAID and are included as supplementary  
76 data. Aliquots of purified RNA samples no longer needed for diagnosis were deidentified and transferred to  
77 Rutgers's laboratory for initial testing of the multiplex variant molecular beacon assay.

### 78 **RNA Purification from inactivated SARS-CoV-2 Virus**

79 10,000 copies of each inactivated Variant of Concern SARS-CoV-2 virus from ZeptoMetrix (Buffalo, NY)  
80 (catalog# NATSARS(COV2)-VP) was treated with proteinase K in a 210  $\mu$ L reaction (1% SDS, 25 mM EDTA, 10  
81 mM Tris pH8.3 and 20  $\mu$ g proteinase K (Thermo Fisher, catalog #25530049)) at 45°C for 30min, to decrosslink  
82 the protein matrix entrapping the viral RNA. After the addition of 1-2 $\mu$ g of yeast carrier tRNA (Roche, Basel,  
83 Switzerland, catalog #10109495001), purification of the RNA was performed using the QIAgen RNeasy Mini kit  
84 (catalog #74104).

### 35 **Multiplex qRT-PCR with samples**

36 RNA purified patient and inactivated virus samples were tested in a similar manner to how we tested the  
37 assay's sensitivity and specificity. 5  $\mu$ L of each sample was combined with 15  $\mu$ L each completed master mix  
38 using TaqPath and run as mentioned before.

### 39 **qRT-PCR analysis and plotting**

40 Data generated from the CFX96 Touch Real-Time PCR Detection System was analyzed with Bio-Rad's CFX  
41 Maestro Software Version 2.0, which corrects for fluorescence drift, subtracts the baseline, and fits curves to  
42 each qRT-PCR signal. Threshold cycles ( $C_t$ ) were determined via a manually specified single threshold of our  
43 analyzed data, which was clearly above all negative control signals. For the specificity plots, fluorescent signals  
44 were normalized by dividing all values by the highest fluorescent value in each channel for the respective  
45 tubes.

### 46 **Results**

## Design of a two-tube, eight mutation, multiplex qRT-PCR assay for SARS-CoV-2 Variants

In our assay, SARS-CoV-2 variants were identified by probing the coding region of the spike protein transcript for the presence of eight different point mutations, as detailed in Figure 1. Since only the mutants are expected to yield a positive signal, we included an additional set of primers and molecular beacons for a conserved region of the viral *N* gene in Tube one as a positive control for the presence of the virus. Since the multiplexing capacity of common thermal cyclers is 4 or 5 colors, we divided the assay into two tubes. The colors of the molecular beacons and the locations of the primers are indicated in Figure 1A. In Tube one, there were three amplicons, and in Tube two, all four targets were present in the same amplicon.

Even though individual isolates of each variant may possess other mutations, we focused on sets of mutations that are functionally the most important. By using *in vitro* binding and epidemiological data of how these mutations affect immune evasion and binding to the ACE2 receptor<sup>2-5,17,18</sup>, we chose to identify the mutations shown in Figure 1: d69-70, K417N/T, L452R, T478K, E484K/Q, and N501Y. We also chose these mutations such that a single mutation in Tube one is sufficient to identify the VOCs, which of course is subject to change as the virus evolves. The mutations targeted in Tube two complete the identification of the VOCs and identify other common mutations, which are useful for identifying other variants.

### The variant molecular beacon assay is specific for the identification of common SARS-CoV-2 variant mutations

Before assembling our multiplex assay, we designed molecular beacons for each targeted mutation, determined their thermal denaturation profiles, and tested them in monoplex PCRs. To determine whether the molecular beacons were allele discriminating at the annealing temperature, we determined the thermal denaturation profiles of the molecular beacons by themselves, and together with mutant or wild-type targets. In these experiments, the targets were synthetic oligonucleotides, and they were used in a molar excess above the molecular beacon concentration. A representative profile is shown in Figure 2, and the profiles of all the

It is made available under a [CC-BY-NC 4.0 International license](https://creativecommons.org/licenses/by-nc/4.0/) .

20 molecular beacons are shown in Supplementary Figure 2. Although, the window of discrimination varies  
21 somewhat from molecular beacon to molecular beacon, all of our molecular beacons permitted single  
22 nucleotide discrimination (see Figure 3A). After qualifying the molecular beacons in this manner, we  
23 performed a set of monoplex PCR assays for each mutation, using wild-type targets and mutant targets in  
24 alternate reactions.

25 When all the monoplex reactions indicated successful amplification and allele discrimination, we assembled two  
26 multiplex reactions that included all the primers and molecular beacons, as detailed in Figure 1. To demonstrate  
27 the specificity of the multiplex assays, six pairs of reactions were carried out, in which each reaction received  
28 5,000 copies of either the wild type, B.1.1.7 (Alpha), B.1.351 (Beta), P.1 (Gamma), B.1.427 (Epsilon), or E484Q  
29 and T478K (Kappa/Delta)-containing spike RNA sequences. The targets were *in vitro*-transcribed RNAs  
30 corresponding to a portion of the spike protein, or commercially available RNA standards, as detailed in  
31 methods and in the legend to Figure 3. The results of these reactions are presented in Figure 3A, where the  
32 targets are indicated inside the panels, and the color response of each molecular beacon is indicated by the  
33 color of the line. This data shows that when the wild-type SARS-CoV-2 genome is present, only the *N* gene  
34 positive control signal occurs. When testing spike RNAs containing the variant mutations, the correct mutations  
35 were identified. For example, the Beta variant (B.1.351) contains not only the uniquely identifying K417N  
36 mutation, but also the N501Y and E484K mutation.

### 37 **The variant molecular beacon assay can detect at as few as five copies of viral RNA**

38 To demonstrate the sensitivity of the variant molecular beacon assay, PCR assays were initiated with serial  
39 dilutions of each target. The results are shown in Figure 3B. Each dilution series tested from 5,000 copies to  
40 0.5 copies. Where a clear signal was present, the threshold cycle was determined by a manually identified  
41 single threshold for each channel. Reactions starting with as little as five copies yielded a detectable signal in  
42 each case. The correlation coefficients between the logarithm of the copy number and the threshold cycles in

It is made available under a [CC-BY-NC 4.0 International license](https://creativecommons.org/licenses/by-nc/4.0/) .

each case are each greater than 0.98, showing a very strong exponential relationship between the two. These results also indicate that in Tube one, which contains four pairs of primers, the amplification of multiple different amplicons does not interfere with each other, which would diminish sensitivity.

### **Inactivated virus and patient sample strains of SARS-CoV-2 are accurately identified**

After demonstrating the specificity and sensitivity of the variant molecular beacon assay with *in vitro*-transcribed RNAs, we performed this assay on RNA purified from inactivated virus obtained from ZeptoMetrix (Buffalo, NY). As can be seen in Figure 4A, our assay identified each of the mutations as listed in Figure 1B for the respective VOC. We next tested a set of patient samples (RNA extracted from mid-nasal swabs) that were SARS-CoV-2 positive, as identified by a multiplex screening assay, which we previously developed (Figure S2). After being identified as positive for SARS-CoV-2 by this assay, the samples were sequenced to identify all mutations present in the strains' genomes, this sequencing data is available online at <https://data.mendeley.com/datasets/v3n2dzt8st/1>. Afterwards, the RNA extracted from the samples were then provided to Rutgers in a blinded manner for variant identification.

These RNA samples were tested using the two-tube variant molecular beacon assay, as described above.

Figure 4B shows the threshold cycles for each molecular beacon target in each sample. All samples tested positive for the *N* gene positive control signal. Two samples were identified as the Alpha variant (B.1.1.7 with d69-70 and N501Y), two samples were identified as the Epsilon variant (B.1.427/429 with only L452R), eight samples were identified as the Delta variant (B.1.617.2 with L452R and T478K), ten samples had the E484K mutation, although not associated with any VOCs, and four samples had none of the targeted mutations and therefore are not any of the currently identified VOCs.

After strain identification was performed with the variant molecular beacon assay, the results were compared with sequencing data, which was in complete agreement. Our results indicate 100% sensitivity and specificity of the assay as tested so far. It is also notable that one of the samples possessed an L452Q mutation, which is



It is made available under a [CC-BY-NC 4.0 International license](https://creativecommons.org/licenses/by-nc/4.0/) .

56 similar to the L452R mutation, but the L452R molecular beacon did not show a fluorescent signal due to the  
57 L452Q mutation, further confirming the specificity of the results of our single nucleotide discriminating  
58 molecular beacons.

### 59 **Design and implementation of an Omicron identifying molecular beacon assay**

70 The recent emergence of the omicron variant, which possesses over 30 mutations in the spike protein,  
71 necessitates the design of a new identifying single nucleotide discriminating molecular beacon. Since a  
72 number of Omicron mutations occur in the target regions of the two-tube assay, it is not feasible to  
73 incorporate uniquely Omicron specific molecular beacons into the two-tube assay discussed above in a  
74 straightforward manner. Therefore, a new two-color Omicron specific assay was designed by targeting the  
75 E484A mutation, which is unique in the Omicron variant (represented in Fig. 5A), along with N gene detection.  
76 Previous studies have also shown that this mutation is important for immune evasion<sup>19</sup>. The melt curve for the  
77 designed molecular beacon is shown in Figure 5B, which shows high specificity for its intended target at the  
78 annealing temperature of the assay of 58°C. Next the sensitivity was tested using *in vitro*-transcribed Omicron  
79 spike fragment RNA, similar to what was done previously. The results in Figure 5C show the sensitivity to  
80 detect 50 copies of the RNA target. The sequences of probes and primers are listed in Table 3 and the  
81 amplicon schematic is shown in Figure 5A. This Omicron assay was tested against the other VOC sequences  
82 and the results in Figure 5D show clear identification of the Omicron variant, with no signals from any other  
83 target sequences. We then tested thirty-three recent patient samples identifying seventeen of them as  
84 Omicron (Figure 5E). These samples were also analyzed using the TaqPath COVID-19 Multiplex Diagnostic  
85 Solution assay (ThermoFisher, Waltham, MA) in which Omicron variant fails to produce a S gene specific signal  
86 because one of the primers binds in the Omicron variant's d69-70 mutation. This S gene dropout data was  
87 provided to Rutgers in a blinded manner and upon comparison it was found to be in complete agreement,

38 indicating high accuracy of our assay. However, in contrast with TaqPath COVID-19 Multiplex Diagnostic  
39 Solution assay our assay yields a positive signal for a unique mutation in the Omicron variant.

## 30 Discussion

31 Molecular beacons designed to differentiate point mutations are an ideal tool for genotyping on a global scale  
32 due to their ease of design and production. In the case of newer emerging variants, molecular beacons can  
33 quickly be synthesized and validated for that variant's identification, which can help to monitor strains, and  
34 improve patient care via epidemiological tracking. Utilizing the outlined strategy, molecular beacons for new  
35 targets can be designed and added to the assay in two or three weeks. This assay not only enables the  
36 identification of the four variants of concern and many variants of interest, but since it targets many known  
37 mutations that confer increased transmission and immune evasion, it will be able to identify new variants that  
38 recombine with existing mutations. An example of the assay's ability to pick up newer variants lies in the Delta  
39 variant's mutations, which include the L452R mutation that is also present in the Epsilon variant as can be  
40 seen in Figure 1B.

41 Due to the specificity of the molecular beacons, other mutations in the target region do not elicit false-positive  
42 signals. Evidence of this is found in the lack of signal in one of the samples which contained the L452Q  
43 mutation, as identified by sequencing. More evidence of the specificity is in the clean differentiation of the  
44 K417T and K417N mutations, as well as the E484Q, E484K, and E484A mutations, where these signals only  
45 become positive in the presence of their respective mutations. This specificity enables precise identification,  
46 but also comes with the downside that mutations in the binding region of the molecular beacon could result in  
47 false-negative signals. Despite this, if other mutations do arise near the uniquely identifiable mutations, such  
48 as in the case of the Omicron variant, this can be accounted for by either designing different molecular  
49 beacons, or by introducing degenerate nucleotides into the current molecular beacons.

It is made available under a [CC-BY-NC 4.0 International license](https://creativecommons.org/licenses/by-nc/4.0/) .

L0 This study is limited by the number of patient samples tested. In the cases where a variant harbors multiple  
L1 mutations in the target regions of molecular beacons of the two-tube assay, false negatives may result due to  
L2 the high specificity of molecular beacons. However, in such situations a completely new assay can be easily  
L3 assembled with equal ease as was demonstrated in the case of Omicron variant in Figure 5.

L4 This assay introduces the sequences of many useful molecular beacons for the identification of point  
L5 mutations in SARS-CoV-2. These variant molecular beacon assays are most useful as a screening tool for  
L6 positive SARS-CoV-2 patient samples which can identify all major VOC (see Figure 1B). The primers and  
L7 molecular beacons can also be combined in varying combinations to test for other pathogens, they can be  
L8 added to current assays, and they can be used with human RNA controls as were added in the multiplex  
L9 COVID-19 multiplex screening assay (see Supplementary Figure S2). These assays can then be used to test for  
L0 the most common variants in a region or to directly test human samples as a single pathogen/COVID-19  
L1 variant identification test in general practice.

L2 Here we describe multiplexed molecular beacon assays for the classification of SARS-CoV-2 variants via their  
L3 identifying functional mutations. We have shown that the assay clearly differentiates between the different  
L4 SARS-CoV-2 variant sequences, and accurately classifies patient samples that have been identified by deep  
L5 sequencing technologies and S gene dropout assays. All primer and probe sequences used in this assay are  
L6 listed in Tables 1 and 3 to facilitate SARS-CoV-2 variant genotyping on a larger scale, and to address the public  
L7 need for variant tracking.

## L8 **Acknowledgements**

L9 This research was supported through a grant from NIH R01 CA227291 and a grant from ResourcePath, LLC. We  
L0 would like to specifically acknowledge Diana Y. Vargas for her help in designing the SARS-CoV-2 multiplex  
L1 screening assay.

## 32 **Conflicts of Interest**

33 D. Ashley Hill is the Medical Director of ResourcePath and Amanda P. Field, Alicia Brownlee, and Alex Cironi  
34 are employed by ResourcePath. ResourcePath partly funded this work through a grant to Rutgers. Ryan J.  
35 Dikdan, Salvatore A.E. Marras, and Sanjay Tyagi declare no conflicts of interests.

## 36 **Ethics Statement**

37 This study used archived, de-identified samples left over from clinical testing. The study received expedited approval  
38 with full waiver of consent, Advarra IRB# Pro00058476.

## 39 **Data Sharing**

40 All sequencing data is available online through Mendeley Data at  
41 <https://data.mendeley.com/datasets/v3n2dzt8st/1> .

## 42 **Authors' Contributions**

43 Conceptualization and methodology were performed by RJD, SAEM, and ST. AH, AB, AC, AF provided the  
44 patient samples which were tested, and the sequencing results they generated were used to validate the  
45 assay used. The original draft was written by RJD, and review and editing were performed by all authors. ST  
46 and SAEM supervised RJD in running experiments.

## 47 **References**

- 48 1. Fontanet A, Autran B, Lina B, Kieny MP, Karim SSA, Sridhar D. SARS-CoV-2 variants and ending the  
49 COVID-19 pandemic. *Lancet*, 2021, 397:952–4
- 50 2. Davies NG, Barnard RC, Jarvis CI, Kucharski AJ, Munday J, Pearson CAB, Russell TW, Tully DC, Abbott S,  
51 Gimma A, Waites W, Wong KLM, van Zandvoort K, Eggo RM, Funk S, Jit M, Atkins KE, Edmunds WJ,  
52 Houben R, Meakin SR, Quilty BJ, Liu Y, Flasche S, Lei J, Sun FY, Krauer F, Lowe R, Bosse NI, Nightingale

It is made available under a [CC-BY-NC 4.0 International license](https://creativecommons.org/licenses/by-nc/4.0/) .

53 ES, Sherratt K, Abbas K, O'Reilly K, Gibbs HP, Villabona-Arenas CJ, Waterlow NR, et al. Estimated  
54 transmissibility and severity of novel SARS-CoV-2 Variant of Concern 202012/01 in England. MedRxiv,  
55 2020

56 3. Deng X, Garcia-Knight MA, Khalid MM, Servellita V, Wang C, Morris MK, Sotomayor-González A, Glasner  
57 DR, Reyes KR, Gliwa AS, Reddy NP, Sanchez San Martin C, Federman S, Cheng J, Balcerek J, Taylor J,  
58 Streithorst JA, Miller S, Kumar GR, Sreekumar B, Chen P-Y, Schulze-Gahmen U, Taha TY, Hayashi J,  
59 Simoneau CR, McMahon S, Lidsky P V, Xiao Y, Hemarajata P, Green NM, Espinosa A, Kath C, Haw M, Bell  
60 J, Hacker JK, et al. Transmission, infectivity, and antibody neutralization of an emerging SARS-CoV-2  
61 variant in California carrying a L452R spike protein mutation. MedRxiv Prepr Serv Heal Sci, 2021

62 4. Wang P, Casner RG, Nair MS, Wang M, Yu J, Cerutti G, Liu L, Kwong PD, Huang Y, Shapiro L, Ho DD.  
63 Increased resistance of SARS-CoV-2 variant P.1 to antibody neutralization. Cell Host Microbe, 2021,  
64 29:747-751.e4

65 5. Weisblum Y, Schmidt F, Zhang F, DaSilva J, Poston D, Lorenzi JCC, Muecksch F, Rutkowska M, Hoffmann  
66 HH, Michailidis E, Gaebler C, Agudelo M, Cho A, Wang Z, Gazumyan A, Cipolla M, Luchsinger L, Hillyer  
67 CD, Caskey M, Robbiani DF, Rice CM, Nussenzweig MC, Hatziioannou T, Bieniasz PD. Escape from  
68 neutralizing antibodies 1 by SARS-CoV-2 spike protein variants. Elife, 2020, 9:1

69 6. Lusvarghi S, Wang W, Herrup R, Neerukonda SN, Vassell R, Bentley L, Eakin AE, Erlandson KJ, Weiss CD.  
70 Key substitutions in the spike protein of SARS-CoV-2 variants can predict resistance to monoclonal  
71 antibodies, but other substitutions can modify the effects. BioRxiv, 2021:2021.07.16.452748

72 7. Bandoy DJDR, Weimer BC. Analysis of SARS-CoV-2 genomic epidemiology reveals disease transmission  
73 coupled to variant emergence and allelic variation. Sci Rep, 2021, 11:7380

74 8. Nasir JA, Kozak RA, Aftanas P, Raphenya AR, Smith KM, Maguire F, Maan H, Alruwaili M, Banerjee A,

It is made available under a [CC-BY-NC 4.0 International license](https://creativecommons.org/licenses/by-nc/4.0/) .

- 75 Mbareche H, Alcock BP, Knox NC, Mossman K, Wang B, Hiscox JA, McArthur AG, Mubareka S. A  
76 comparison of whole genome sequencing of sars-cov-2 using amplicon-based sequencing, random  
77 hexamers, and bait capture. *Viruses*, 2020, 12
- 78 9. Izquierdo-Lara R, Elsinga G, Heijnen L, Oude Munnink BB, Schapendonk CME, Nieuwenhuijse D, Kon M,  
79 Lu L, Aarestrup FM, Lycett S, Medema G, Koopmans MPG, De Graaf M. Monitoring SARS-CoV-2  
30 circulation and diversity through community wastewater sequencing, the netherlands and belgium.  
31 *Emerg Infect Dis*, 2021, 27:1405–15
- 32 10. Bonnet G, Tyagi S, Libchaber A, Kramer FR. Thermodynamic basis of the enhanced specificity of  
33 structured DNA probes. *Proc Natl Acad Sci U S A*, 1999, 96:6171–6
- 34 11. Marras SAE, Kramer FR, Tyagi S. Multiplex detection of single-nucleotide variations using molecular  
35 beacons. *Genet. Anal. - Biomol. Eng.*, vol. 14, *Genet Anal*, 1999, pp. 151–6
- 36 12. Kostrikis LG, Tyagi S, Mhlanga MM, Ho DD, Kramer FR. Spectral genotyping of human alleles. *Science*  
37 (80- ), 1998, 279:1228–9
- 38 13. Untergasser A, Cutcutache I, Koressaar T, Ye J, Faircloth BC, Remm M, Rozen SG. Primer3-new  
39 capabilities and interfaces. *Nucleic Acids Res*, 2012, 40:e115
- 40 14. Markham NR, Zuker M. DINAMelt web server for nucleic acid melting prediction. *Nucleic Acids Res*,  
41 2005, 33
- 42 15. Tyagi S, Bratu DP, Kramer FR. Multicolor molecular beacons for allele discrimination. *Nat Biotechnol*,  
43 1998, 16:49–53
- 44 16. Corman VM, Landt O, Kaiser M, Molenkamp R, Meijer A, Chu DK, Bleicker T, Brünink S, Schneider J,  
45 Schmidt ML, Mulders DG, Haagmans BL, Veer B van der, Brink S van den, Wijsman L, Goderski G,

It is made available under a [CC-BY-NC 4.0 International license](https://creativecommons.org/licenses/by-nc/4.0/) .

06 Romette J-L, Ellis J, Zambon M, Peiris M, Goossens H, Reusken C, Koopmans MP, Drosten C. Detection of  
07 2019 novel coronavirus (2019-nCoV) by real-time RT-PCR. *Eurosurveillance*, 2020, 25

08 17. Kim S, Liu Y, Lei Z, Dicker J, Cao Y, Zhang XF, Im W. Differential Interactions Between Human ACE2 and  
09 Spike RBD of SARS-CoV-2 Variants of Concern. *BioRxiv*, 2021

10 18. Khan A, Zia T, Suleman M, Khan T, Ali SS, Abbasi AA, Mohammad A, Wei DQ. Higher infectivity of the  
11 SARS-CoV-2 new variants is associated with K417N/T, E484K, and N501Y mutants: An insight from  
12 structural data. *J Cell Physiol*, 2021

13 19. Harvey WT, Carabelli AM, Jackson B, Gupta RK, Thomson EC, Harrison EM, Ludden C, Reeve R, Rambaut  
14 A, Peacock SJ, Robertson DL. SARS-CoV-2 variants, spike mutations and immune escape. *Nat Rev*  
15 *Microbiol* 2021 197, 2021, 19:409–24

08 **Figures Legends and Table**

| Reaction   | Oligo       | Sequence                                                                     | Concentration                    |
|------------|-------------|------------------------------------------------------------------------------|----------------------------------|
| Tube 1     | K417f       | 5'-GGTGATGAAGTCAGACAAATCG-3'                                                 | 100 nM                           |
|            | S.K417N-MB  | 5'-FAM- <u>ccggcc</u> GCAAAGTGGAAATATTGCTGATTATgcccgg-BHQ1-3'                | 250 nM                           |
|            | S.K417T-MB  | 5'-Quasar705- <u>ccggct</u> CAAAGTGGAAACGATTGCTGATagcccgg-BHQ2-3'            | 250 nM                           |
|            | K417r       | 5'-GCAGCCTGTAAAATCATCTGG-3'                                                  | 500 nM                           |
|            | L452Rf      | 5'-AGGCTGCGTTATAGCTTGGA-3'                                                   | 100 nM                           |
|            | S.L452R-MB  | 5'-Quasar670- <u>cgctcgc</u> GGTAATTATAATTACCGGTATAGATTGTTTAGcgcgacg-BHQ2-3' | 250 nM                           |
|            | L452Rr      | 5'-TCAGTTGAAATATCTCTCTCAAAGGT-3'                                             | 500 nM                           |
|            | d69-70f     | 5'-GAACTCAATTACCCCTGCAT-3'                                                   | 100 nM                           |
|            | S.d69-70-MB | 5'-CFG540- <u>cgctcg</u> GTTCCATGCTAT CTCTGGGACCAcgcgacg-BHQ1-3'             | 150 nM                           |
|            | d69-70r     | 5'-TGGTAGGACAGGGTTATCAA-3'                                                   | 500 nM                           |
|            | CDC-N1-F    | 5'-GACCCCAAATCAGCGAAAT-3'                                                    | 50 nM                            |
|            | N1-MB       | 5'-CFR610- <u>cgcgag</u> ACCCCGCATTACGTTTGGTGGACCctcgcg-BHQ2-3'              | 50 nM                            |
|            | CDC-N1-R    | 5'-TCTGGTACTGCCAGTTGAATCTG-3'                                                | 250 nM                           |
|            | Tube 2      | T478Kf                                                                       | 5'-TTGTTTAGGAAGTCTAATCTCAAACC-3' |
| S.T478K-MB |             | 5'-HEX- <u>ccgcga</u> CCGGTAGCAAACCTTGTAATtccggg-BHQ1-3'                     | 250 nM                           |
| S.E484K-MB |             | 5'-CFR610- <u>cgcagg</u> CTTGTAATGGTGTAAAGGTTTTAATTGcctcgcg-BHQ2-3'          | 250 nM                           |
| S.E484Q-MB |             | 5'-FAM- <u>cgcggg</u> CTTGTAATGGTGTCAAGGTTTTAATTGcccgcg-BHQ1-3'              | 250 nM                           |
| S.N501Y-MB |             | 5'-Quasar670- <u>gCCAACCC</u> ACTTATGGTGTGGc-BHQ2-3'                         | 250 nM                           |
| N501Yr     |             | 5'-ACAAACAGTTGCTGGTGCAT-3'                                                   | 500 nM                           |

09

10 **Table 1.** – Primers and probes used in multiplex assay. Sequences are shown in the 5'→3' direction. Upper  
 11 case text indicates that it is a binding sequence, underlined text forms the hairpins of the molecular beacons,  
 12 and bold letters indicate the point mutation nucleotides being identified by that molecular beacon. A gap  
 13 indicates where the deletion is for the d69-70 molecular beacon. Abbreviations used: CFG = Cal Fluor Gold  
 14 540, CFR = Cal Fluor Red 610, BHQ = Black Hole Quencher

15



It is made available under a [CC-BY-NC 4.0 International license](https://creativecommons.org/licenses/by-nc/4.0/) .

| Oligonucleotide name      | Sequence                                                                  |
|---------------------------|---------------------------------------------------------------------------|
| CoV-RdRP forward          | 5'-GTGARATGGTCATGTGTGGCGG-3'                                              |
| CoV-RdRP reverse          | 5'-CARATGTTAAASACACTATTAGCATA-3'                                          |
| CoV-RdRP molecular beacon | 5'-FAM - <u>CGCAG</u> GGTGGAACCTCATCAGGAGATGC <u>CTGCG</u> - BHQ1-3'      |
| CoV-N forward             | 5'-GACCCCAAATCAGCGAAAT-3'                                                 |
| CoV-N reverse             | 5'-TCTGGTTACTGCCAGTTGAATCTG-3'                                            |
| CoV-N molecular beacon    | 5'-CFR - <u>CGCGAG</u> ACCCCGCATTACGTTTGGTGGACC <u>CTCGCG</u> - BHQ2-3'   |
| ACTB forward              | 5'-CCCAGCACAATGAAGATCAAGATC-3'                                            |
| ACTB reverse              | 5'-AAGCATTTGCGGTGGACGAT-3'                                                |
| ACTB molecular beacon     | 5'-Q705 - <u>CGCCCG</u> GCAAGCAGGAGTATGACGAGTCCGG <u>CGGGCG</u> - BHQ2-3' |

L6

L7 **Table 2.** – Listing sequences of oligonucleotides used in the SARS-CoV-2 multiplex screening assay presented in

L8 Figure S2. FAM = fluorescein, CFR = Cal Fluor Red 610, Q705 = Quasar 705, BHQ = Black Hole Quencher,

L9 underlined nucleotides in molecular beacon probes indicate the 5' and 3' arm regions of the probe.

L10

It is made available under a [CC-BY-NC 4.0 International license](https://creativecommons.org/licenses/by-nc/4.0/) .

| Oligo      | Sequence                                                                  | Concentration |
|------------|---------------------------------------------------------------------------|---------------|
| T478Kf     | 5'-TTGTTTAGGAAGTCTAATCTCAAACC-3'                                          | 100 nM        |
| S.E484A-MB | 5'-Cy5.5- <u>ccgcct</u> TTGTAATGGTGTTCAGGTTTTAATT <u>aggcgg</u> -BHQ2-3'  | 250nM         |
| N501Yr     | 5'-ACAAACAGTTGCTGGTGCAT-3'                                                | 500 nM        |
| CDC-N1-F   | 5'-GACCCCAAATCAGCGAAAT-3'                                                 | 50 nM         |
| N1-MB      | 5'-CFR610- <u>cgcgag</u> ACCCCGCATTACGTTTGGTGGACC <u>cctcgcg</u> -BHQ2-3' | 50 nM         |
| CDC-N1-R   | 5'-TCTGGTACTGCCAGTTGAATCTG-3'                                             | 250 nM        |

21 Table 3. – Primers and probes used in Omicron assay. Sequences are shown in the 5'->3' direction. Upper case  
22 text indicates that it is a binding sequence, underlined text forms the hairpins of the molecular beacons, and  
23 bold letters indicate the point mutation nucleotides being identified by that molecular beacon. Abbreviations  
24 used: CFR = Cal Fluor Red 610, BHQ = Black Hole Quencher

25

It is made available under a [CC-BY-NC 4.0 International license](https://creativecommons.org/licenses/by-nc/4.0/) .

26 **Figure 1. – A.** A schematic representation of the primers and molecular beacons used in the assay. A small  
27 black x on the molecular beacons target binding regions indicates that the molecular beacon is single  
28 nucleotide discriminant. **B.** Identifying key mutations present in each variant. The mutations detected in the  
29 assay are shown in the rows and variants are shown in the columns. Each of the variants of concern can be  
30 identified by these combinations of mutations as well as the variants of interest, see supplemental chart.  
31 Abbreviations used: CFG = Cal Fluor Gold 540, CFR =Cal Fluor Red 610, Q670 = Quasar 670, Q705 = Quasar 705.

32  
33 **Figure 2. –** The florescence of the T478K discriminating molecular beacon, as a function of temperature, in the  
34 presence and absence of targets. When no target is present, dotted line, the fluorescence increases as  
35 temperature rises due to the helical order of the stem giving way to a random-coil configuration, separating  
36 the fluorophore from the quencher, and resulting in fluorescence. When the molecular beacon binds to its  
37 target its stem dissociates which turns on its fluorescence. Due to the higher binding strength of the perfect  
38 probe-target hybrid, solid line, compared to the imperfect probe-target hybrid, dashed line, the imperfect-  
39 probe target hybrid dissociates at a lower temperature. The PCR monitoring temperature (58°C) is indicated  
40 by the vertical dashed line and the window of good discrimination by the shaded area.

41  
42 **Figure 3. –** Demonstration of specificity and sensitivity of the variant molecular beacon assay. **A.** Each panel  
43 shows the amplification curves of a single multiplex reaction using either the Tube one or Tube two specified  
44 primers and probes (columns), and the indicated *in vitro* transcribed RNA targets (rows). The ‘wildtype’  
45 template is RNA of the original strain of SARS-CoV-2’s entire genome. The labeled strains contain the RNA  
46 sequences of the S gene from the respective SARS-CoV-2 variants and the sample labeled Kappa/Delta uses an  
47 RNA corresponding to (positions 1251-1630nt in the Spike protein coding sequence) and containing the E484Q  
48 and T478K mutations, which are from the B.1.617 (Kappa) and B.1.617.2 (Delta) variants. This Kappa/Delta

It is made available under a [CC-BY-NC 4.0 International license](https://creativecommons.org/licenses/by-nc/4.0/) .

49 Spike RNA fragment was generated and used due to the lack of commercially available *in vitro*-transcribed  
50 RNA's at the time. **B.** Sensitivity analysis was run by diluting templates containing the specified mutations from  
51 5,000 copies down to 0.5 copies per reaction. The  $C_t$  values are plotted against the template copy number and  
52 the correlation coefficients of the natural log of the copy number to the  $C_t$  are greater than 0.98 for all  
53 amplification products, with around a 3  $C_t$  delay between 10-fold dilutions, both as expected.

54  
55 **Figure 4.** – Threshold cycle ( $C_t$ ) data for virus and patient samples using the variant molecular beacon assay. **A.**  
56 Virus samples. All VOC virus samples tested were accurately identified as shown in Figure 1B. **B.** Patient  
57 samples. All samples test positive for the *N* gene control. For the other targets, a  $C_t$  value less than 40  
58 indicates the presence of the specified mutation, which can be used to identify the variants of the virus. For  
59 example, the presence of the T478K and L452R in pt19 indicates that this virus is the Delta variant. All the  
60 specified mutations shown in this figure have been sequence confirmed by deep sequencing.

61  
62 **Figure 5.** – Duplex assay for the Omicron variant. **A.** Schematic showing the locations of primers and molecular  
63 beacons. **B.** Thermal denaturation profile of the molecular beacon with various target sequences. **C.** Linearity  
64 of detection of *in vitro*-transcribed RNA corresponding to a portion of Omicron S gene. **D.** Specificity of the  
65 Omicron assay using synthetic targets (described in Figure 3). **E.** Analysis of 33 recently collected SARS-CoV-2  
66 samples by the duplex omicron assay.

A

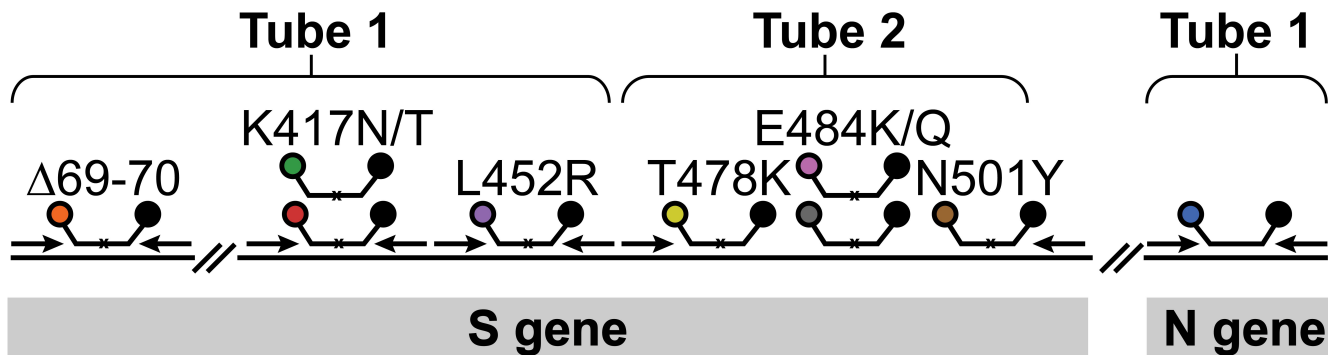

B

|        |       | Strain   |                     |                    |                 |                       |
|--------|-------|----------|---------------------|--------------------|-----------------|-----------------------|
|        |       | A        | VOC B.1.1.7 (Alpha) | VOC B.1.351 (Beta) | VOC P.1 (Gamma) | VOC B.1.617.2 (Delta) |
|        | Label | Target   |                     |                    |                 |                       |
| Tube 1 | FAM   | S.K417N  |                     | X                  |                 |                       |
|        | CFG   | S.d69-70 |                     | X                  |                 |                       |
|        | CFR   | N1       | X                   | X                  | X               | X                     |
|        | Q670  | S.L452R  |                     |                    |                 | X                     |
|        | Q705  | S.K417T  |                     |                    | X               |                       |
| Tube 2 | FAM   | S.E484Q  |                     |                    |                 |                       |
|        | HEX   | S.T478K  |                     |                    |                 | X                     |
|        | CFR   | S.E484K  |                     | +/-                | X               | X                     |
|        | Q670  | S.N501Y  |                     | X                  | X               | X                     |

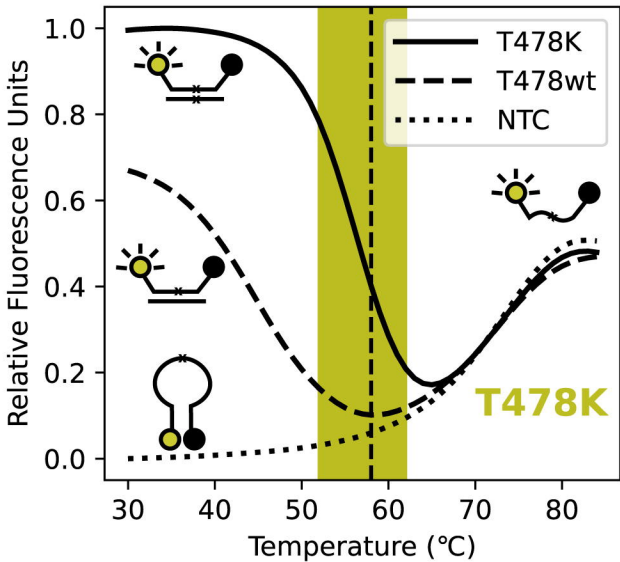

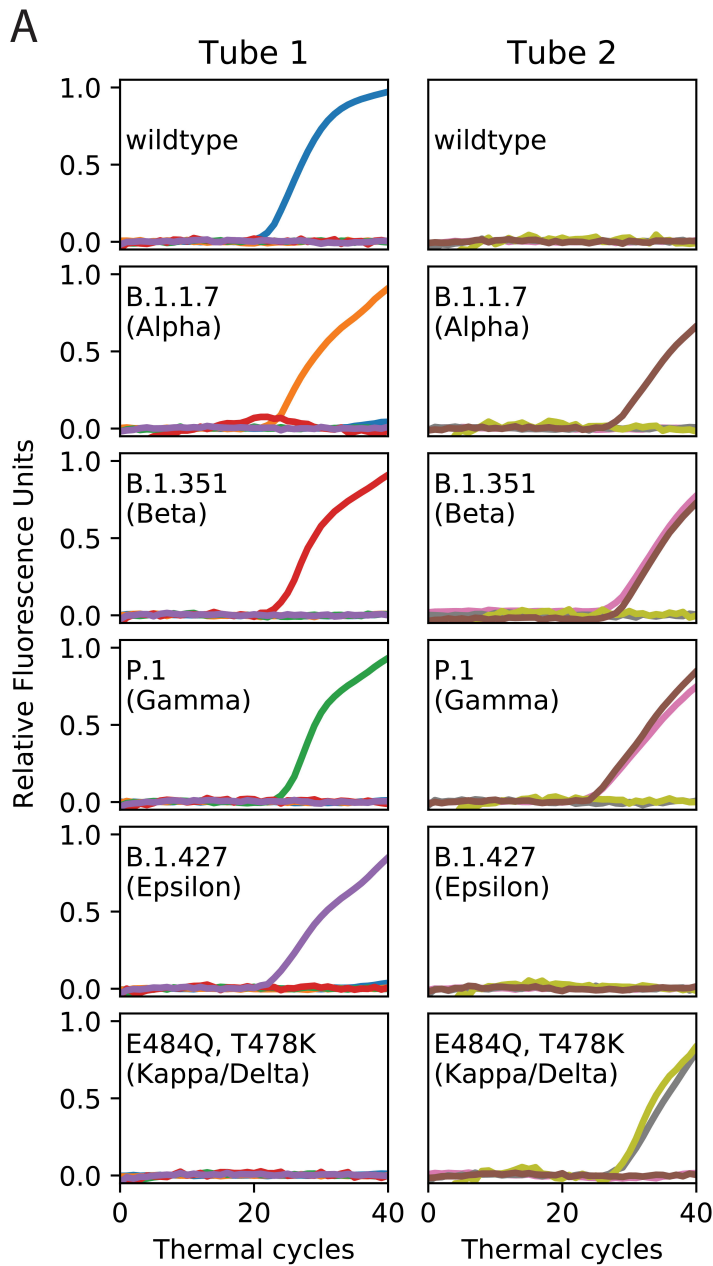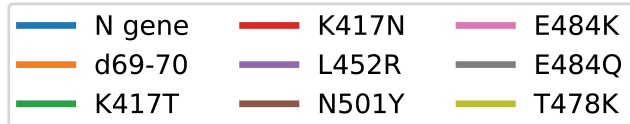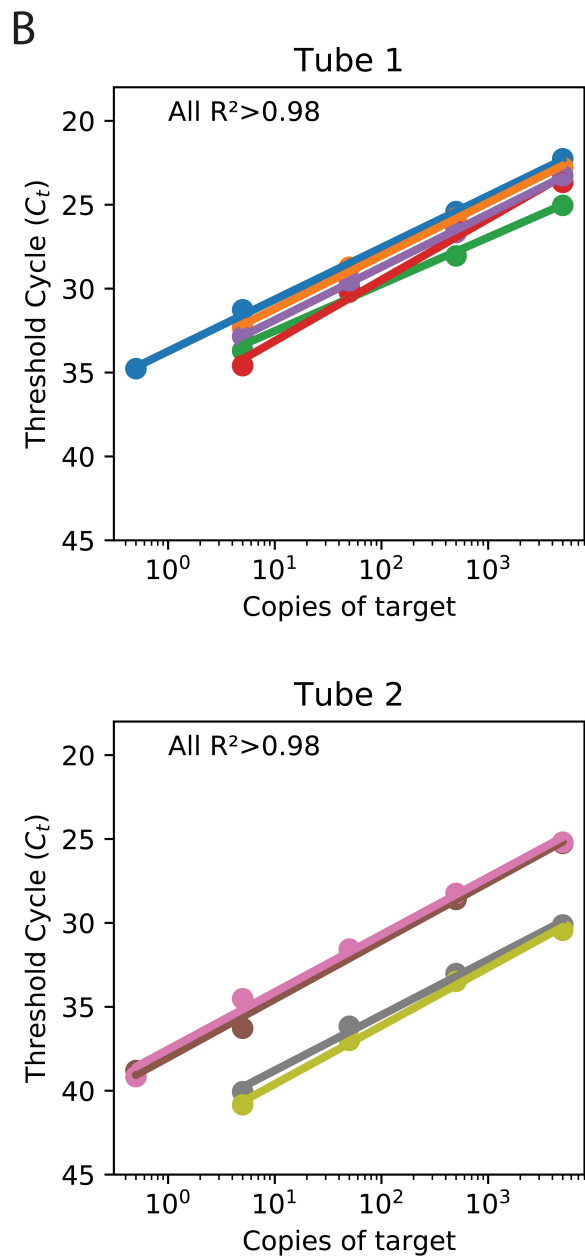

**A** Inactivated SARS-CoV-2 VOC

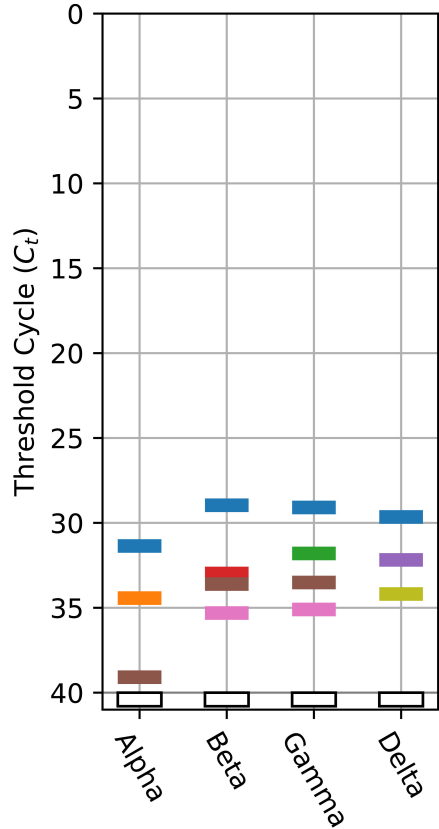

**B** Patient Samples

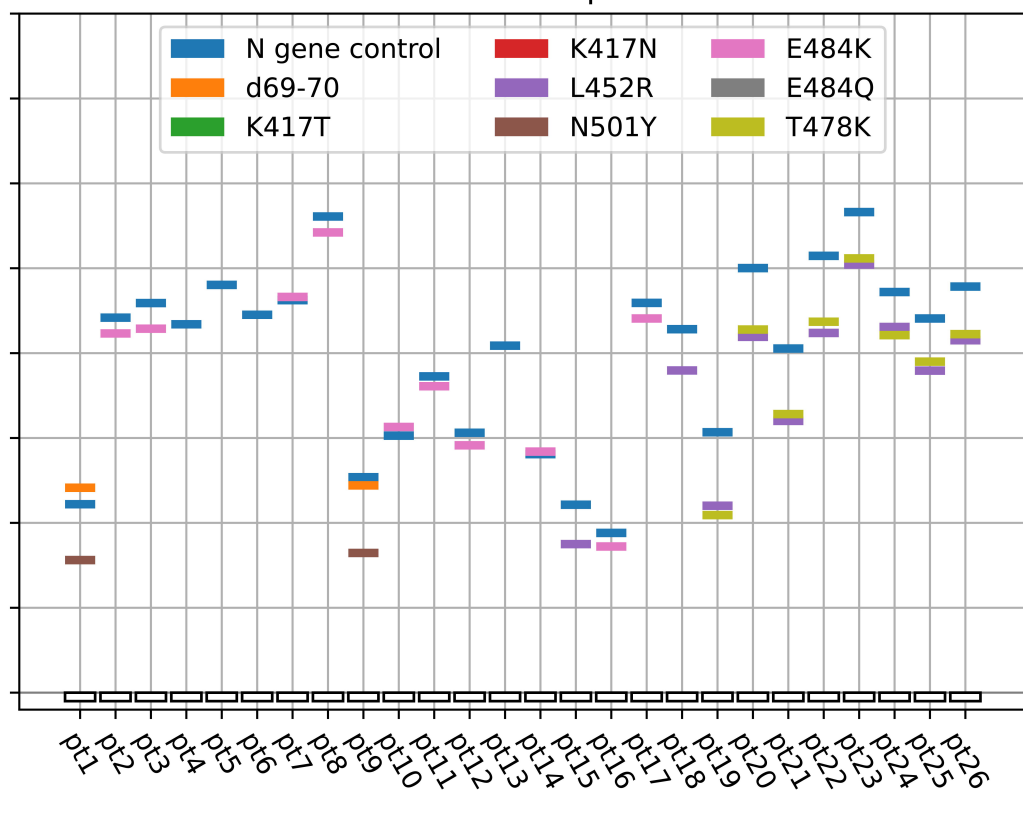



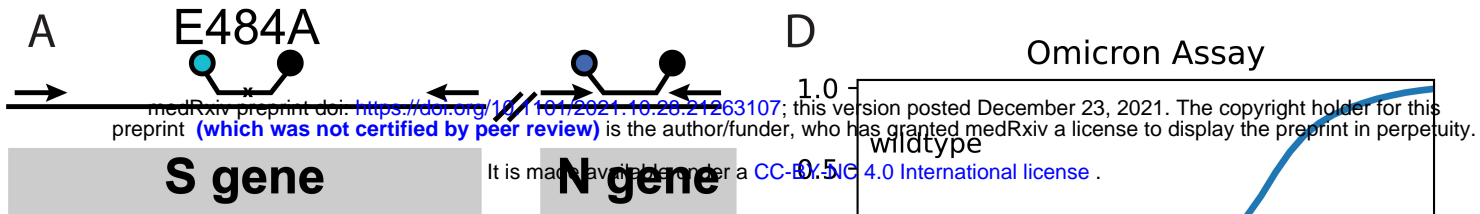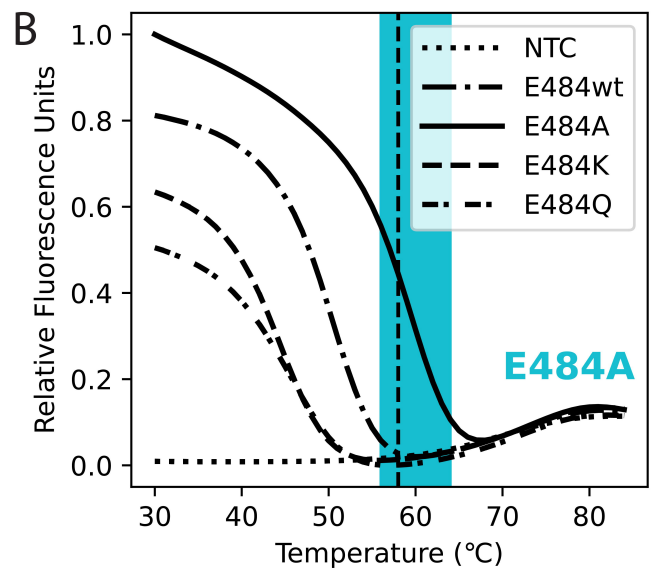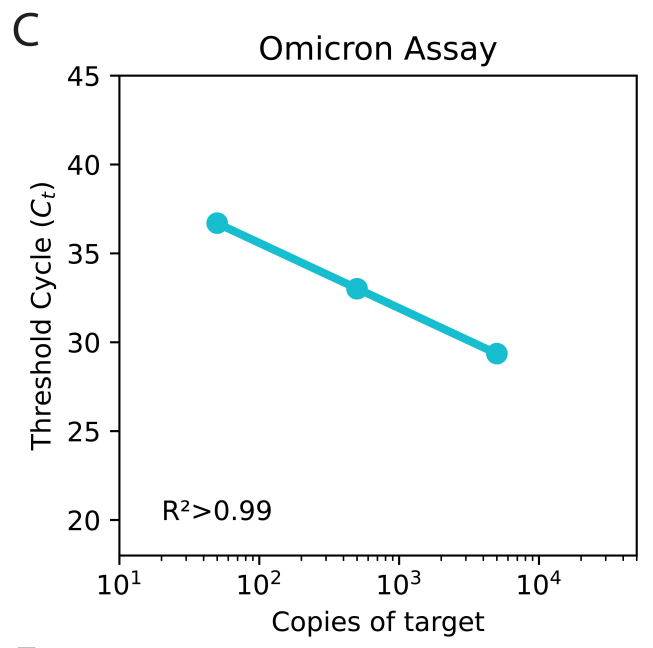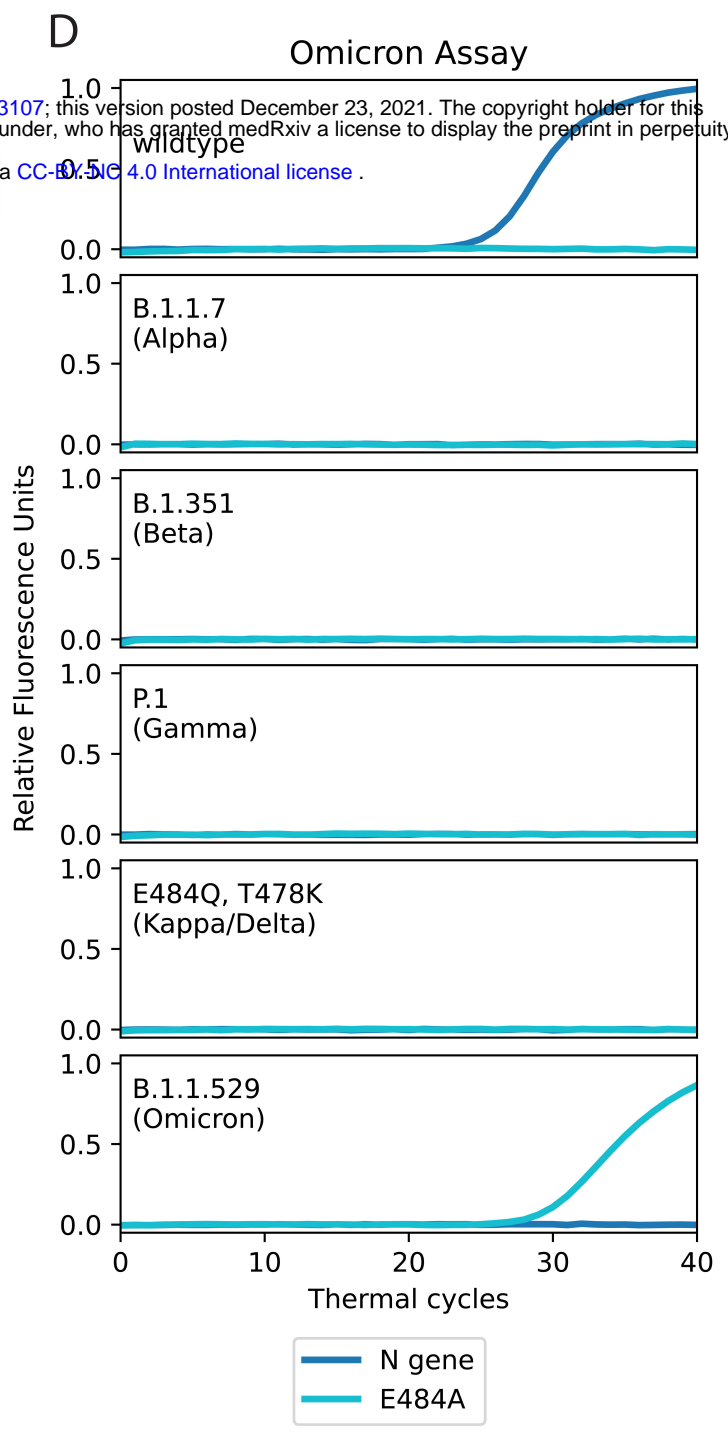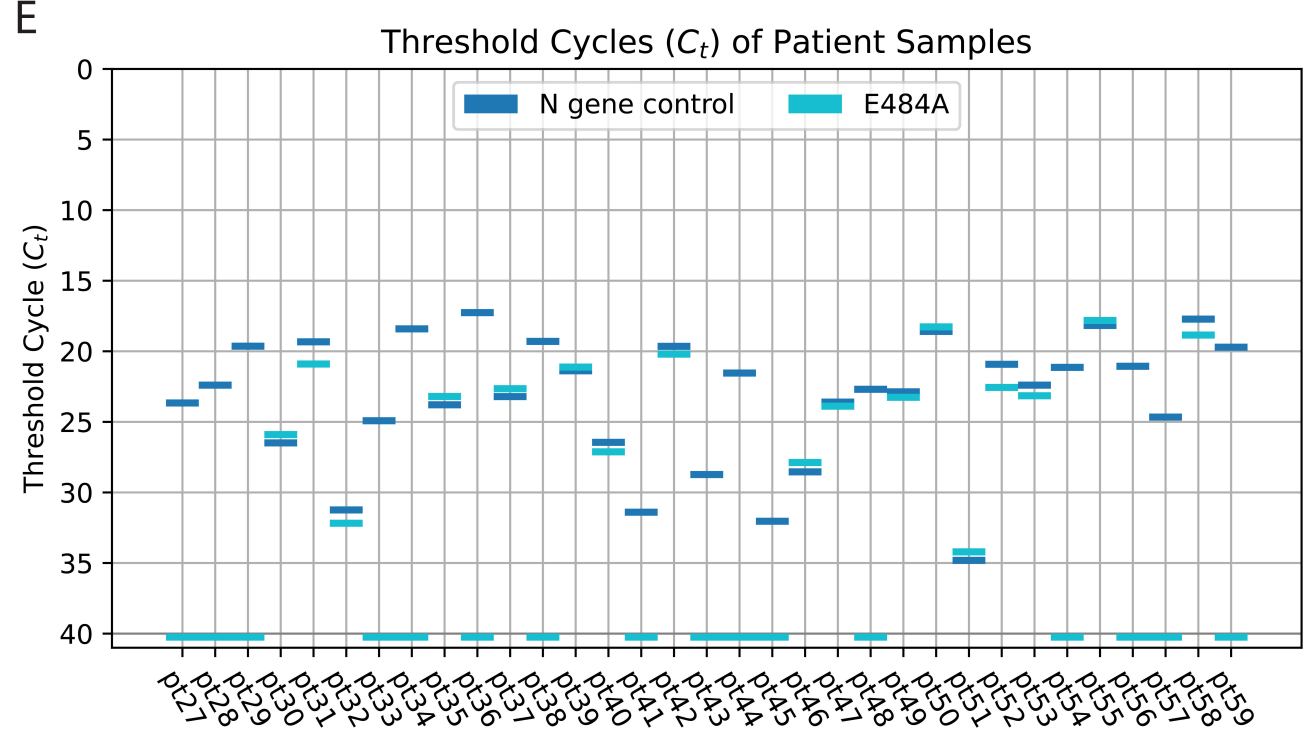

Source: https://medrxiv.org/content/10.1101/2021.10.28.21263107.full.pdf
